# Supplementary material for: Synthesis of Effect Sizes on Dose Response from Ultra-Processed Food Consumption against Various Noncommunicable Diseases
Source: MDPI journal article supplement (doi:10.3390/foods12244457), 2023-12-12
Supplement: s1 [file s1]

Table S1. Inclusion Articles for Effect Size Synthesis

| No | Authors | Design Study/Data Source                                                        | Population/<br>Years/<br>(Woman/<br>Man) | Processed Food<br>Assesment Method                                       | Outcomes                                                                                               |
|----|---------|---------------------------------------------------------------------------------|------------------------------------------|--------------------------------------------------------------------------|--------------------------------------------------------------------------------------------------------|
|    |         |                                                                                 | Diabetes                                 |                                                                          |                                                                                                        |
| 1. | [16]    | Prospective cohort/the French NutriNet-Sante cohort (2009-2016)                 | N= 104707/≥18 years/(82907/21800)        | 24-h food records/ NOVA food classification/weight proportion            | Absolute increment 10% upf can increase risk of type 2 diabetes mellitus (HR= 1.13, 95% CI= 1.01-1.27) |
| 2. | [17]    | Prospective cohort                                                              | N= 70421/≥45 years/(41267/29154)         | Food frequency questionnaire/ NOVA food classification/weight proportion | Absolute increment 10% upf can increase 25% type 2 diabetes mellitus (OR 1.17 (1.09-1.26)              |
| 3. | [18]    | Prospective cohort/ Diet and Risk of Cardiovascular Diseases in Spanish (DRECE) | N= 4679//≥30 years/(2391/2288)           | Food frequency questionnaire/NOVA food classification/weight proportion  | 10% increment (HR= 1.15, 95% CI= 1.03-1.30)                                                            |
| 4. | [19]    | Prospective cohort/UK Biobank (2007-2019)                                       | N= 21730/40-56 years/(11299/10431)       | 24-h dietary recall/ NOVA food classification/weight proportion          | 10% increment (HR= 1.12, 95% CI= 1.04-1.20)                                                            |
| 5. | [20]    | Cross-sectional/Canadian Community Health Survey Nutrition                      | N= 13608/24-73 years/(6801/6807)         | 24-h dietary recall/ NOVA food classification/weight proportion          | 10% increment (OR= 1.06, 95% CI= 1.01-1.12)                                                            |

| Cancer            |      |                                                                                 |                                                        |                                                                         |                                                                                                                                                                                             |
|-------------------|------|---------------------------------------------------------------------------------|--------------------------------------------------------|-------------------------------------------------------------------------|---------------------------------------------------------------------------------------------------------------------------------------------------------------------------------------------|
| 1.                | [11] | Prospective cohort/French NutriNet-Sante cohort (2009-2017)                     | N= 104980/≥18 years (82159/22821)                      | 24-h dietary records/NOVA food classification/weight proportion         | Absolute increment 10% upf can increase risk of overall cancer (HR= 1.12, 95% CI= 1.06-1.18)                                                                                                |
| 2.                | [20] | Prospective cohort/ Diet and Risk of Cardiovascular Diseases in Spanish (DRECE) | N= 4679//≥30 years/(2391/2288)                         | Food frequency questionnaire/NOVA food classification/weight proportion | Cancer<br>10% increment(HR= 1.19, 95% CI= 1.04-1.37)                                                                                                                                        |
| Colorectal Cancer |      |                                                                                 |                                                        |                                                                         |                                                                                                                                                                                             |
| 3.                | [21] | Prospective COHORT/Nurse health study (NHS)                                     | N= 202248/30-55 years/(46341/155907)                   | Food frequency questionnaire/NOVA food classification/weight proportion | Men:<br>10% increment (HR= 1.04, 95% CI= 1.01-1.06)<br><br>Women:<br>10% increment (HR= 1.01, 95% CI= 0.98-1.04)                                                                            |
| 4.                | [22] | Population-based control study                                                  | Colorectal N= 1852, BC N= 1486, PC N= 3543/55-66 years | Food frequency questionnaire/NOVA food classification/weight proportion | Absolute increment 10% upf can increase risk of colorectal cancer (OR= 1.11, 95% CI= 1.04-1.18), breast cancer (OR= 1.03, 95% CI= 0.96-1.11), prostate cancer (OR= 1.02, 95% CI= 0.93-1.12) |

|                               |      |                                                                                              |                                     |                                                                          |                                                                               |
|-------------------------------|------|----------------------------------------------------------------------------------------------|-------------------------------------|--------------------------------------------------------------------------|-------------------------------------------------------------------------------|
|                               |      |                                                                                              |                                     |                                                                          | <b>Cancer</b>                                                                 |
|                               |      |                                                                                              |                                     |                                                                          | 10% increment (HR= 1.02,<br>95% CI= 1.01-1.04)                                |
|                               |      |                                                                                              |                                     |                                                                          | <b>Colorectal Cancer</b>                                                      |
|                               |      |                                                                                              |                                     |                                                                          | 10% increment (HR= 1.02,<br>95% CI= 0.97-1.06)                                |
|                               |      |                                                                                              |                                     |                                                                          | <b>Breast Cancer</b>                                                          |
|                               |      |                                                                                              |                                     |                                                                          | 10% increment (HR= 1.00,<br>95% CI= 0.97-1.03)                                |
| 6.                            | [23] | Prospective cohort/UK Biobank                                                                | N= 15921/56-58 years                | 24-h dietary recall/NOVA food classification/weight proportion           | <b>Pre-Menopausal Breast Cancer</b>                                           |
|                               |      |                                                                                              |                                     |                                                                          | 10% increment (HR= 1.00,<br>95% CI= 0.95-1.04)                                |
|                               |      |                                                                                              |                                     |                                                                          | <b>Post-Menopausal Breast Cancer</b>                                          |
|                               |      |                                                                                              |                                     |                                                                          | 10% increment (HR= 1.00,<br>95% CI= 0.95-1.04)                                |
|                               |      |                                                                                              |                                     |                                                                          | <b>Prostate Cancer</b>                                                        |
|                               |      |                                                                                              |                                     |                                                                          | 10% increment (HR= 0.99,<br>95% CI= 0.96-1.02)                                |
| <b>Cardiovascular disease</b> |      |                                                                                              |                                     |                                                                          |                                                                               |
| 1.                            | [10] | Prospective cohort                                                                           | N= 105159/36-48 years/(83247/21912) | 24-h dietary records/ NOVA food classification/weight proportion         | Absolute increment 10% upf can increase all CVD (HR= 1.12, 95% CI= 1.05-1.20) |
| 2.                            | [20] | Population-based cohort/European Prospective Investigation into Cancer and Nutrition (EPIC)/ | N= 24325/64-68 years                | Food frequency questionnaire/ NOVA food classification/weight proportion | 10% increment (HR= 1.42, 95% CI= 1.20-1.69)                                   |

|                |      |                                                                              |                                      |                                                                          |                                                                                                                                                                |
|----------------|------|------------------------------------------------------------------------------|--------------------------------------|--------------------------------------------------------------------------|----------------------------------------------------------------------------------------------------------------------------------------------------------------|
| 3.             | [24] | Prospective cohort/Diet and Risk of Cardiovascular Diseases in Spain (DRECE) | N= 4679//≥30 years/(2391/2288)       | Food frequency questionnaire/NOVA food classification/weight proportion  | 10% increment (HR= 1.14, 95% CI= 1.01-1.29)                                                                                                                    |
| 4.             | [25] | Prospective Cohort/Framingham offspring study                                | N= 3003//≥50 years                   | Food frequency questionnaire/NOVA food classification/weight proportion  | 10% increment (HR= 1.050, 95% CI= 1.020-1.080)                                                                                                                 |
| 5.             | [26] | Observational study                                                          | N= 91891/≥55-66 years                | Food frequency questionnaire/ NOVA food classification/weight proportion | 10% Increment (HR= 1.05, 95% CI= 1.02-1.08)                                                                                                                    |
| <b>Obesity</b> |      |                                                                              |                                      |                                                                          |                                                                                                                                                                |
| 1.             | [12] | Cross-sectional/Canadian Community Health Survey                             | N= 19363/≥18-65 years/(8903/10460)   | 24-h dietary recall/klasifikasi NOVA food/weight proportion              | 10% Increment: obesity for high school (OR= 1.01, 95% CI= 0.96-1.07), college (OR= 1.05, 95% CI= 0.98-1.12), university diploma (OR= 1.18, 95% CI= 1.09-1.28). |
| 2.             | [18] | Prospective cohort/French Prospective Population-Based NutriNet Sante Cohort | N= 110260/≥35-48 years/(86223/24037) | 24-h dietary records/ NOVA food classification/weight proportion         | 10% Increment: overweight (HR= 1.10, 95% CI= 1.07-1.13) dan obesity (HR= 1.10, 95% CI= 1.05-1.14)                                                              |
| 3.             | [27] | Prospective cohort study/UK Biobank                                          | N= 22659/≥40-57 years/10844/11815)   | 24-h dietary recall/ NOVA food classification/weight proportion          | 10% Increment: HR= 1.10, 95% CI= 0.99-1.22                                                                                                                     |

|    |      |                                                                            |                                  |                                                                |                                                      |
|----|------|----------------------------------------------------------------------------|----------------------------------|----------------------------------------------------------------|------------------------------------------------------|
| 4. | [28] | Cross-sectional study/National Diet and Nutrition Survey Rolling Programme | N= 6143/≥19 years/(2961/3182)    | 24-h dietary recall/NOVA food classification/weight proportion | 10% Increment: obesity (OR= 1.18, 95% CI= 1.08-1.28) |
| 5. | [29] | Cross-sectional/Canadian Community Health Survey-Nutrition                 | N= 13608/<br>≥19 until ≥65 years | 24-h dietary recall/NOVA food classification/weight proportion | 10% Increment: obesity (OR= 1.06, 95% CI= 1.02-1.11) |
| 6. | [30] | Cross-sectional study/ NHANES                                              | N= 2329/≥60 years                | 24-h dietary recall/NOVA food classification/weight proportion | 110% increment (HR= 0.99, 95% CI= 0.99-1.01)         |

**NOTES:** BC, breast cancer; PC, prostate cancer; UPF, ultra-processed foods

Table S2. The Newcastle-Ottawa Quality Assessment Scale

## 1. Newcastle-Ottawa Quality Assessment Scale Cross-Sectional Studies

|                                         | Authors                                    | Nardocci<br>et al. 2019 | Nardocci<br>et al. 2021 | Rauber<br>et al.<br>2021 | Hao<br>et al.<br>2022 |
|-----------------------------------------|--------------------------------------------|-------------------------|-------------------------|--------------------------|-----------------------|
| <b>Selection:</b> (Maximum 5 stars)     | 1. Representativeness of the case?         | *                       | *                       | *                        | *                     |
|                                         | 2. Justice of sample size                  | *                       | *                       | *                        | *                     |
|                                         | 3. Satisfactory response rate              |                         |                         |                          |                       |
|                                         | 4. Validated tools for exposure assessment | **                      | **                      | *                        | *                     |
| <b>Comparability:</b> (Maximum 1 stars) | 5. Controlling for confounding factors     | *                       | *                       | *                        | *                     |
| <b>Outcome:</b> (Maximum 3 stars)       | 6. Outcome assessment                      | *                       | *                       | **                       | **                    |
|                                         | 7. Appropriate statistical test            | *                       | *                       | *                        | *                     |
| <b>Total Score</b>                      |                                            | <b>7</b>                | <b>7</b>                | <b>7</b>                 | <b>7</b>              |

## 2. Newcastle-Ottawa Quality Assessment Scale Case-Control Studies

|                                         | Authors                                                            | Romaguera<br>et al. 2020 |
|-----------------------------------------|--------------------------------------------------------------------|--------------------------|
| <b>Selection:</b> (Maximum 4 stars)     | 1. Is the case definition adequate?                                | *                        |
|                                         | 2. Representativeness of the cases                                 | *                        |
|                                         | 3. Selection of control                                            |                          |
|                                         | 4. Definition of control                                           | *                        |
| <b>Comparability:</b> (Maximum 2 stars) | 5. Comparability of cohorts on the basis of the design or analysis | *                        |
| <b>Outcome:</b> (Maximum 4 stars)       | 6. Ascertainment of exposure                                       | *                        |
|                                         | 7. Same method of ascertainment for cases and controls             | *                        |
|                                         | 8. Non-Response rate                                               | *                        |
| <b>Total Score</b>                      |                                                                    | <b>7</b>                 |

### 3. Newcastle-Ottawa Quality Assessment Scale Cohort Studies

|                                            | <b>Authors</b>                                                                          | Fiolet<br>et al.<br>2018 | Beslay<br>et al.<br>2020 | Rauber<br>et al.<br>2020 | Srour<br>et al.<br>2019 | Srour<br>et al.<br>2020 | Juul et<br>al.<br>2021 | Levy<br>et al.<br>2021 | Zhong<br>et al.<br>2021 | Bonaccio<br>et al. 2022 | Duan<br>et al.<br>2022 | Ferreiro<br>et al.<br>2022 | Wang<br>et al.<br>2022 | Chang<br>et al.<br>2023 |
|--------------------------------------------|-----------------------------------------------------------------------------------------|--------------------------|--------------------------|--------------------------|-------------------------|-------------------------|------------------------|------------------------|-------------------------|-------------------------|------------------------|----------------------------|------------------------|-------------------------|
| <b>Selection:</b><br>(Maximum 4 stars)     | 1. Representativeness of the exposed cohort                                             | *                        | *                        | *                        | *                       | *                       | *                      | *                      | *                       | *                       | *                      | *                          | *                      | *                       |
|                                            | 2. Selection of the non-exposed cohort                                                  | *                        | *                        | *                        | *                       | *                       | *                      | *                      | *                       | *                       | *                      | *                          | *                      | *                       |
|                                            | 3. Ascertainment of exposure                                                            | *                        | *                        | *                        | *                       | *                       | *                      | *                      | *                       | *                       | *                      | *                          | *                      | *                       |
|                                            | 4. Demonstration that the current outcome of interest was not present at start of study | *                        | *                        | *                        | *                       | *                       | *                      | *                      | *                       | *                       | *                      | *                          | *                      | *                       |
| <b>Comparability:</b><br>(Maximum 2 stars) | 5. Comparability of cohorts on the basis of the design or analysis                      | *                        | **                       | **                       | *                       | *                       | *                      | *                      | **                      | *                       | **                     | *                          | *                      | *                       |
| <b>Outcome:</b><br>(Maximum 4 stars)       | 6. Assessment of outcome                                                                | *                        | *                        | *                        | *                       | *                       | *                      | *                      | *                       | *                       | *                      | *                          | *                      | *                       |
|                                            | 7. Was follow-up long enough for outcome to occur                                       | *                        | *                        | *                        | *                       | *                       | *                      | *                      | *                       |                         | *                      | *                          | *                      | *                       |
|                                            | 8. Adequacy of follow up of cohorts                                                     | *                        | *                        | *                        | *                       | *                       | *                      | *                      | *                       | *                       | *                      | *                          | *                      | *                       |
| <b>Total Score</b>                         |                                                                                         | <b>8</b>                 | <b>9</b>                 | <b>9</b>                 | <b>8</b>                | <b>8</b>                | <b>8</b>               | <b>8</b>               | <b>9</b>                | <b>8</b>                | <b>9</b>               | <b>8</b>                   | <b>8</b>               | <b>8</b>                |

Table S3. Food Types that Consumed

| NO              | AUTHORS (YEARS)              | FOOD TYPES                                                                                                                                                                                                                                                                                                                          | 10% INCREMENT                                                     | PARAMETERS                                                                         |
|-----------------|------------------------------|-------------------------------------------------------------------------------------------------------------------------------------------------------------------------------------------------------------------------------------------------------------------------------------------------------------------------------------|-------------------------------------------------------------------|------------------------------------------------------------------------------------|
| <b>DIABETES</b> |                              |                                                                                                                                                                                                                                                                                                                                     |                                                                   |                                                                                    |
| 1.              | Srouf <i>et al.</i> 2020     | Unprocessed foods, culinary ingredients, processed foods, ultra-processed foods                                                                                                                                                                                                                                                     | Increment 10% consumption of upf in the total diet (kcal/d)       | Body weight change dan BMI $\geq 30$ kg/m <sup>2</sup> .                           |
| 2.              | Duan <i>et al.</i> 2022      | Unprocessed foods, culinary ingredients, processed foods, ultra-processed foods (warm savory snack, traditional dutch cuisine, sweet snack, cold savory snack)                                                                                                                                                                      | Increment of 10% consumption of upf in the total diet (kcal/d)    | BMI > 26.2 kg/m <sup>2</sup><br>Fasting glucose > 4.96 mmol/L                      |
| 3.              | Ferreiro <i>et al.</i> 2022  | Unprocessed foods, culinary ingredients, processed foods, ultra-processed foods                                                                                                                                                                                                                                                     | Increment 10% consumption of upf in the total diet (kcal/d)       | Diabetes history and reported by professional                                      |
| 4.              | Levy <i>et al.</i> 2021      | Minimally processed foods, culinary ingredients, processed foods, ultra-processed foods (bread, pastry, cake, industrial-processed chips (French fries), processed meat, pastries, cakes, dessert, biscuit, margarin and other spreads, packaged salty snacks, sauce/dressing, breakfast cereal, meat products, ready-to-eat meals) | Increment 10% consumption of upf in the total diet (kcal/d)       | BMI > 27.2 kg/m <sup>2</sup>                                                       |
| 5.              | Nardocci <i>et al.</i> 2021  | Unprocessed foods, culinary ingredients, processed foods, ultra-processed foods                                                                                                                                                                                                                                                     | 10% increase in relative intake of ultra-processed foods (kcal/d) | BMI $\geq 30$ kg/m <sup>2</sup><br>Diabetes history and reported by a professional |
| <b>CANCER</b>   |                              |                                                                                                                                                                                                                                                                                                                                     |                                                                   |                                                                                    |
| 1.              | Fiolet <i>et al.</i> 2018    | Unprocessed foods, culinary ingredients, processed foods, ultra-processed foods (sugary products, salty snacks, fats, processed meats, (meats fish, eggs), dairy products, ultra-processed fruits and vegetables, starchy foods and breakfast cereals, drinks)                                                                      | 10% increase of intake in total diet (kcal/d)                     | Cancer history                                                                     |
| 2.              | Ferreiro <i>et al.</i> 2022  | Unprocessed foods, culinary ingredients, processed foods, ultra-processed foods                                                                                                                                                                                                                                                     | Increment 10% consumption of upf in the total diet (kcal/d)       | Cancer history and reported by a professional                                      |
| 3.              | Romaguera <i>et al.</i> 2020 | Unprocessed foods, culinary ingredients, processed foods, ultra-processed foods (canned vegetables, canned fish, cheese, sweet and savory snacks, ready to eat foods)                                                                                                                                                               | Increment 10% consumption of upf in the total diet (kcal/d)       | Histology-confirmed newly-diagnoses of cancer                                      |
| 4.              | Wang <i>et al.</i> 2022      | Unprocessed foods, culinary ingredients, processed foods, ultra-processed foods (savory snacks, yogurt and dairy based desserts, ready to eat or heat mixed dishes,(meat, poultry or seafood based products), beverages, sweet snacks and desserts, (fats, condiments, and sauces)                                                  | Increment 10% consumption of upf in the total diet (kcal/d)       | Report any cancer diagnosis in the previous two years from medical record.         |



|                               |                             |                                                                                                                                                                                                                                                                                                                                                                                                                                      |                                                                    |                                                                                                                                                           |
|-------------------------------|-----------------------------|--------------------------------------------------------------------------------------------------------------------------------------------------------------------------------------------------------------------------------------------------------------------------------------------------------------------------------------------------------------------------------------------------------------------------------------|--------------------------------------------------------------------|-----------------------------------------------------------------------------------------------------------------------------------------------------------|
| 5.                            | Chang <i>et al.</i> 2023    | Unprocessed foods, processed culinary ingredient, processed food, ultra-processed food                                                                                                                                                                                                                                                                                                                                               | Increment 10% consumption of upf in the total diet (kcal/d)        | Cancer History                                                                                                                                            |
| <b>CARDIOVASCULAR DISEASE</b> |                             |                                                                                                                                                                                                                                                                                                                                                                                                                                      |                                                                    |                                                                                                                                                           |
| 1.                            | Srouf <i>et al.</i> 2019    | Unprocessed foods, culinary ingredients, processed foods, ultra-processed foods                                                                                                                                                                                                                                                                                                                                                      | Increment 10% consumption of upf in the total diet (kcal/d)        | CVD reported                                                                                                                                              |
| 2.                            | Bonaccio <i>et al.</i> 2022 | Unprocessed foods, culinary ingredients, processed foods, ultra-processed foods (processed meat, (cake, pies, pastries, pudding), crispbread, pizza, ice cream, dry cakes, snacks, chocolate, spreadable cheese, breakfast cereal, confectionery, sliced cheese, margarine, nut spread, biscuit, dressing)                                                                                                                           | Increment 10% consumption of pf and upf in the total diet (kcal/d) | Biomarkers in serum blood samples (cystatin C, creatinine, blood glucose, total blood cholesterol, HDL-cholesterol, diastolic blood pressure, heart rate) |
| 3.                            | Ferreiro <i>et al.</i> 2022 | Unprocessed foods, culinary ingredients, processed foods, ultra-processed foods                                                                                                                                                                                                                                                                                                                                                      | Increment 10% consumption of upf in the total diet (kcal/d)        | Cardiovascular disease history and reported by a professional                                                                                             |
| 4.                            | Juul <i>et al.</i> 2021     | Minimally processed foods, culinary ingredients, processed foods, ultra-processed foods                                                                                                                                                                                                                                                                                                                                              | Increment 10% consumption of upf in the total diet (kcal/d)        | Cardiovascular disease reported                                                                                                                           |
| 5.                            | Zhong <i>et al.</i> 2021    | Minimally processed foods, culinary ingredients, ultra-processed foods (cereals, soft drinks, sauces/dressings, ultra-processed dairy products, sugary products, salty snacks, margarine, meat and fish, ultra-processed fruits and vegetables, ultra-processed fruits and vegetables)                                                                                                                                               | Increment 10% consumption of upf in the total diet (kcal/d)        | Information on vital status by US National Death Index                                                                                                    |
| <b>OBESEITY</b>               |                             |                                                                                                                                                                                                                                                                                                                                                                                                                                      |                                                                    |                                                                                                                                                           |
| 1.                            | Nardocci <i>et al.</i> 2019 | Unprocessed foods, culinary ingredients, processed foods, ultra-processed foods (cheese, canned or preserved food, industrial packaged breads, confectionary, drinks, fast food dishes, margarine, sauces and spreads, sweetened breakfast cereal, salty snacks, reconstituted meat products, sweetened milk-based products)                                                                                                         | 10% increase in relative intake of ultra-processed food (kcal/d)   | BMI $\geq$ 30 kg/m <sup>2</sup>                                                                                                                           |
| 2.                            | Beslay <i>et al.</i> 2020   | Unprocessed foods, culinary ingredients, processed foods, ultra-processed foods                                                                                                                                                                                                                                                                                                                                                      | Increment of 10% in the diet (kcal/d)                              | BMI $\geq$ 30 kg/m <sup>2</sup>                                                                                                                           |
| 3.                            | Rauber <i>et al.</i> 2020   | Minimally processed foods, culinary ingredients, processed foods, ultra-processed foods (cheese, vegetables preserved in brine, processed breads, slated/smoked/canned meat and fish, ultra-processed breads, packaged pre-prepared meals, breakfast cereals, reconstituted meat products, confectionary, pastries/buns/cakes, industrial chips, drinks, milk-based drinks, salty snacks, pizza, margarine, sauce/dressing, dessert) | 10% increase in the consumption (% of total energy upf)            | BMI $\geq$ 30 kg/m <sup>2</sup><br>WC $\geq$ 102 cm for men and $\geq$ 88 cm for women                                                                    |

|                                                             |                             |                                                                                                                                                                                                        |                                                                   |                                                                                        |
|-------------------------------------------------------------|-----------------------------|--------------------------------------------------------------------------------------------------------------------------------------------------------------------------------------------------------|-------------------------------------------------------------------|----------------------------------------------------------------------------------------|
| 4.                                                          | Rauber et al. 2021          | Unprocessed foods, culinary ingredients, processed foods, ultra-processed (breads, snacks and desserts, frozen and shelf stable ready-to-eat/heat meals, beverages, breakfast cereals, spreads/sauces) | 10% increase in the consumption (kcal/d)                          | BMI $\geq$ 30 kg/m <sup>2</sup><br>WC $\geq$ 102 cm for men and $\geq$ 88 cm for women |
| 5.                                                          | Nardocci <i>et al.</i> 2021 | Unprocessed foods, culinary ingredients, processed foods, ultra-processed foods                                                                                                                        | 10% increase in relative intake of ultra-processed foods (kcal/d) | BMI $\geq$ 30 kg/m <sup>2</sup>                                                        |
| 6.                                                          | Hao <i>et al.</i> 2022      | Unprocessed foods, culinary ingredients, processed foods, ultra-processed foods                                                                                                                        | 10% increase in relative intake of ultra-processed foods (kcal/d) | BMI $\geq$ 30 kg/m <sup>2</sup>                                                        |
| <b>NOTES:</b> WC, Waist Circumference; BMI, Body Mass Index |                             |                                                                                                                                                                                                        |                                                                   |                                                                                        |

Table S4. Ultra-Processed Foods Contribution in Weight Proportion to Nutritional Intake

| ENERGY INTAKE |                             |      |                   |                    |    |                                         |                      |                     |                |                     |                |      |
|---------------|-----------------------------|------|-------------------|--------------------|----|-----------------------------------------|----------------------|---------------------|----------------|---------------------|----------------|------|
| NO REF        | STUDY                       | YEAR | COUNTRY OF ORIGIN | TYPE OF STUDY      | Q  | UPF PROPORTION IN WEIGHT PROPORTION (%) | STUDY CODE           | Hi-Mean±SD (Kcal/d) | Hi-Sample Size | Lo-Mean±SD (Kcal/d) | Lo-Sample Size | Auto |
| 1             | Fiolet et al                | 2018 | United Kingdom    | Prospective Cohort | Q2 | 14.3                                    | Fiolet et al (1)     | 2281.1±457.7        | 26245          | 1810.6±454.1        | 26244          | 1    |
|               |                             |      |                   |                    | Q3 | 19.8                                    | Fiolet et al (2)     | 2480.5±472.3        | 26246          | 1810.6±454.1        | 26244          | 1    |
|               |                             |      |                   |                    | Q4 | 32.3                                    | Fiolet et al (3)     | 2615.8±501.8        | 26245          | 1810.6±454.1        | 26244          | 1    |
| 2             | Srour et al                 | 2019 | French            | Prospective Cohort | Q2 | 13                                      | Srour et al (4)      | 1972±475.19         | 26418          | 1835.44±406.63      | 26396          | 1    |
|               |                             |      |                   |                    | Q3 | 18.3                                    | Srour et al (5)      | 2330.35±501.54      | 26326          | 1835.44±406.63      | 26396          | 1    |
|               |                             |      |                   |                    | Q4 | 30.8                                    | Srour et al (6)      | 2530.04±501.23      | 26019          | 1835.44±406.63      | 26396          | 1    |
| 3             | Beslay et al                | 2020 | French            | Prospective Cohort | Q2 | 13.2                                    | Beslay et al (7)     | 2006.5±489          | 27576          | 1816.2±475.8        | 27609          | 1    |
|               |                             |      |                   |                    | Q3 | 18.7                                    | Beslay et al (8)     | 2450.5±507.8        | 27556          | 1816.2±475.8        | 27609          | 1    |
|               |                             |      |                   |                    | Q4 | 32.4                                    | Beslay et al (9)     | 2534.7±534.5        | 27519          | 1816.2±475.8        | 27609          | 1    |
| 4             | Nardocci et al <sup>1</sup> | 2020 | Canada            | Cross Sectional    | Q2 | 38.6 – 58.6                             | Nardocci et al (10)  | 2571±525.06         | 12923          | 1708.8±380.8        | 12923          | 1    |
|               |                             |      |                   |                    | Q3 | 58.7                                    | Nardocci et al (11)  | 2600.4±537.65       | 12454          | 1708.8±380.8        | 12923          | 1    |
| 5             | Nardocci et al <sup>2</sup> | 2020 | Canada            | Cross Sectional    | Q2 | 38.6 – 58.6                             | Nardocci et al (12)  | 2682±542.06         | 13568          | 1708.8±380.8        | 13568          | 1    |
|               |                             |      |                   |                    | Q3 | 58.7                                    | Nardocci et al (13)  | 2900.4±565.65       | 13426          | 1708.8±380.8        | 13568          | 1    |
| 6             | Levy et al                  | 2021 | United Kingdom    | Prospective Cohort | Q2 | 15.4                                    | Levy et al (14)      | 2211.1±597          | 5419           | 1799.3±565.1        | 5446           | 1    |
|               |                             |      |                   |                    | Q3 | 23.6                                    | Levy et al (15)      | 2570±670.5          | 5444           | 1799.3±565.1        | 5446           | 1    |
|               |                             |      |                   |                    | Q4 | 41.9                                    | Levy et al (16)      | 2881.6±767.6        | 5421           | 1799.3±565.1        | 5446           | 1    |
| 7             | Romaguera et al             | 2020 | Spain             | Case Control       | Q2 | 14.55                                   | Romaguera et al (17) | 2128±540            | 1169           | 1720±457            | 1170           | 1    |
|               |                             |      |                   |                    | Q3 | 76.91                                   | Romaguera et al (18) | 2929±622            | 1204           | 1720±457            | 1170           | 1    |
| 8             | Zhong et al                 | 2021 | America           | Prospective Cohort | Q2 | 8                                       | Zhong et al (19)     | 2116.5±555.6        | 18378          | 1440.6±646.6        | 18378          | 1    |
|               |                             |      |                   |                    | Q3 | 16                                      | Zhong et al (20)     | 2330±628.5          | 18379          | 1440.6±646.6        | 18378          | 1    |
|               |                             |      |                   |                    | Q4 | 30                                      | Zhong et al (21)     | 2680.6±724.4        | 18377          | 1440.6±646.6        | 18378          | 1    |
|               |                             |      |                   |                    | Q5 | 82                                      | Zhong et al (22)     | 2954±868.9          | 18379          | 1440.6±646.6        | 18378          | 1    |
| 9             | Bonaccio et al              | 2022 | Italy             | Prospective Cohort | Q2 | 5.8                                     | Bonaccio et al (23)  | 1832±482            | 293            | 1668±497            | 292            | 1    |
|               |                             |      |                   |                    | Q3 | 8.6                                     | Bonaccio et al (24)  | 1996±565            | 293            | 1668±497            | 292            | 1    |
|               |                             |      |                   |                    | Q4 | 15                                      | Bonaccio et al (25)  | 2281±548            | 293            | 1668±497            | 292            | 1    |
| 10            | Duan et al                  | 2022 | Netherlands       | Prospective Cohort | Q2 | 31.6                                    | Duan et al (26)      | 2632±543            | 17606          | 1811±520            | 17604          | 1    |
|               |                             |      |                   |                    | Q3 | 38.4                                    | Duan et al (27)      | 2750±579            | 17606          | 1811±520            | 17604          | 1    |
|               |                             |      |                   |                    | Q4 | 48.7                                    | Duan et al (28)      | 2967±647            | 17606          | 1811±520            | 17604          | 1    |
| 11            | Wang et al*                 | 2022 | United States     | Prospective Cohort | Q2 | 58                                      | Wang et al (29)      | 2886±604            | 9277           | 1879±569            | 9256           | 1    |
|               |                             |      |                   |                    | Q3 | 93                                      | Wang et al (30)      | 2985±613            | 9245           | 1879±569            | 9256           | 1    |

| 12            | Wang et al**   | 2022 | United States     | Prospective Cohort | Q2 | 58                                      | Wang et al (31)     | 2854±529          | 1713           | 528±528           | 13395          | 1    |
|---------------|----------------|------|-------------------|--------------------|----|-----------------------------------------|---------------------|-------------------|----------------|-------------------|----------------|------|
|               |                |      |                   |                    | Q3 | 93                                      | Wang et al (32)     | 2954±524          | 1713           | 528±527           | 13395          | 1    |
| 13            | Chang et al    | 2023 | United Kingdom    | Prospective Cohort | Q2 | 16.7                                    | Chang et al (33)    | 2243.7±544.5      | 49356          | 1817.5±527        | 49357          | 1    |
|               |                |      |                   |                    | Q3 | 24.3                                    | Chang et al (34)    | 2627.7±595        | 49357          | 1817.5±527        | 49357          | 1    |
|               |                |      |                   |                    | Q4 | 41.4                                    | Chang et al (35)    | 2843.3±697.3      | 49356          | 1817.5±527        | 49357          | 1    |
| AVERAGE       |                |      |                   |                    |    |                                         |                     | 2533.36±573.07    | 17383          | 1672.16±492.91    | 18085          |      |
| SODIUM INTAKE |                |      |                   |                    |    |                                         |                     |                   |                |                   |                |      |
| NO REF        | STUDY          | YEAR | COUNTRY OF ORIGIN | TYPE OF STUDY      | Q  | UPF PROPORTION IN WEIGHT PROPORTION (%) | STUDY CODE          | Hi-Mean±SD (mg/d) | Hi-Sample Size | Lo-Mean±SD (mg/d) | Lo-Sample Size | Auto |
| 1             | Fiolet et al   | 2018 | United Kingdom    | Prospective Cohort | Q2 | 14.3                                    | Fiolet et al (36)   | 2731.8±871        | 26245          | 2589.3±881.6      | 26244          | 1    |
|               |                |      |                   |                    | Q3 | 19.8                                    | Fiolet et al (37)   | 2761.9±884.1      | 26246          | 2589.3±881.6      | 26244          | 1    |
|               |                |      |                   |                    | Q4 | 32.3                                    | Fiolet et al (38)   | 2717.7±925        | 26245          | 2589.3±881.6      | 26244          | 1    |
| 2             | Srouf et al    | 2019 | French            | Prospective Cohort | Q2 | 13                                      | Srouf et al (39)    | 2749.9±862.6      | 26418          | 2601.1±867.6      | 26396          | 1    |
|               |                |      |                   |                    | Q3 | 18.3                                    | Srouf et al (40)    | 2782.7±876.9      | 26326          | 2601.1±867.6      | 26396          | 1    |
|               |                |      |                   |                    | Q4 | 30.8                                    | Srouf et al (41)    | 2735.3±923.7      | 26019          | 2601.1±867.6      | 26396          | 1    |
| 3             | Beslay et al   | 2020 | French            | Prospective Cohort | Q2 | 13.2                                    | Beslay et al (42)   | 2696.7±931.5      | 27576          | 2536.2±919.5      | 27609          | 1    |
|               |                |      |                   |                    | Q3 | 18.7                                    | Beslay et al (43)   | 2762±962,1        | 27556          | 2536.2±919.5      | 27609          | 1    |
|               |                |      |                   |                    | Q4 | 32.4                                    | Beslay et al (44)   | 2741±987,4        | 27519          | 2536.2±919.5      | 27609          | 1    |
| 8             | Zhong et al    | 2021 | America           | Prospective Cohort | Q2 | 8                                       | Zhong et al (45)    | 2404.5±919.2      | 18378          | 2171.7±934.5      | 18378          | 1    |
|               |                |      |                   |                    | Q3 | 16                                      | Zhong et al (46)    | 2735.1±1058.3     | 18379          | 2171.7±934.5      | 18378          | 1    |
|               |                |      |                   |                    | Q4 | 30                                      | Zhong et al (47)    | 2980.1±1237.3     | 18377          | 2171.7±934.5      | 18378          | 1    |
|               |                |      |                   |                    | Q5 | 82                                      | Zhong et al (48)    | 3318.3±1457.8     | 18379          | 2171.7±934.5      | 18378          | 1    |
| 9             | Bonaccio et al | 2022 | Italy             | Prospective Cohort | Q2 | 5.8                                     | Bonaccio et al (49) | 2123±740          | 293            | 2062±690          | 292            | 1    |
|               |                |      |                   |                    | Q3 | 8.6                                     | Bonaccio et al (50) | 2130±760          | 293            | 2062±690          | 292            | 1    |
|               |                |      |                   |                    | Q4 | 15                                      | Bonaccio et al (51) | 2072±895          | 293            | 2062±690          | 292            | 1    |
| 13            | Chang et al    | 2023 | United Kingdom    | Prospective Cohort | Q2 | 16.7                                    | Chang et al (52)    | 1825.6±597.3      | 49356          | 151.4±769.4       | 49357          | 1    |
|               |                |      |                   |                    | Q3 | 24.3                                    | Chang et al (53)    | 2027.4±639.6      | 49357          | 151.4±769.4       | 49357          | 1    |
|               |                |      |                   |                    | Q4 | 41.4                                    | Chang et al (54)    | 2252.5±887.9      | 49356          | 151.4±769.4       | 49357          | 1    |
| AVERAGE       |                |      |                   |                    |    |                                         |                     | 2555.13±916.67    | 24348          | 2241.41±843.77    | 24379          |      |

| TOTAL FAT INTAKE     |                |      |                   |                    |    |                                         |                     |                  |                |                  |                |      |
|----------------------|----------------|------|-------------------|--------------------|----|-----------------------------------------|---------------------|------------------|----------------|------------------|----------------|------|
| NO REF               | STUDY          | YEAR | COUNTRY OF ORIGIN | TYPE OF STUDY      | Q  | UPF PROPORTION IN WEIGHT PROPORTION (%) | STUDY CODE          | Hi-Mean±SD (g/d) | Hi-Sample Size | Lo-Mean±SD (g/d) | Lo-Sample Size | Auto |
| 1                    | Fiolet et al   | 2018 | United Kingdom    | Prospective Cohort | Q2 | 14.3                                    | Fiolet et al (71)   | 80.3±24.4        | 26245          | 76±24.3          | 26244          | 1    |
|                      |                |      |                   |                    | Q3 | 19.8                                    | Fiolet et al (72)   | 82.1±25.3        | 26246          | 76±24.3          | 26244          | 1    |
|                      |                |      |                   |                    | Q4 | 32.3                                    | Fiolet et al (73)   | 83.4±27.3        | 26245          | 76±24.3          | 26244          | 1    |
| 2                    | Srou et al     | 2019 | French            | Prospective Cohort | Q2 | 13                                      | Srou et al (74)     | 81.4±24          | 26418          | 77.2±24.1        | 26396          | 1    |
|                      |                |      |                   |                    | Q3 | 18.3                                    | Srou et al (75)     | 83.3±25          | 26326          | 77.2±24.1        | 26396          | 1    |
|                      |                |      |                   |                    | Q4 | 30.8                                    | Srou et al (76)     | 84.4±27.3        | 26019          | 77.2±24.1        | 26396          | 1    |
| 8                    | Zhong et al    | 2021 | America           | Prospective Cohort | Q2 | 8                                       | Zhong et al (77)    | 53.8±24.5        | 18378          | 46±24.4          | 18378          | 1    |
|                      |                |      |                   |                    | Q3 | 16                                      | Zhong et al (78)    | 63.7±29.4        | 18379          | 46±24.4          | 18378          | 1    |
|                      |                |      |                   |                    | Q4 | 30                                      | Zhong et al (79)    | 70.3±34.9        | 18377          | 46±24.4          | 18378          | 1    |
|                      |                |      |                   |                    | Q5 | 82                                      | Zhong et al (80)    | 79.4±41          | 18379          | 46±24.4          | 18378          | 1    |
| 9                    | Bonaccio et al | 2022 | Italy             | Prospective Cohort | Q2 | 5.8                                     | Bonaccio et al (81) | 75.06±1.93       | 293            | 64.85±12.14      | 292            | 1    |
|                      |                |      |                   |                    | Q3 | 8.6                                     | Bonaccio et al (82) | 83.32±6.33       | 293            | 64.85±12.14      | 292            | 1    |
|                      |                |      |                   |                    | Q4 | 15                                      | Bonaccio et al (83) | 84.72±7.73       | 293            | 64.85±12.14      | 292            | 1    |
| 11                   | Wang et al*    | 2022 | United States     | Prospective Cohort | Q2 | 58                                      | Wang et al (84)     | 71.9±12.9        | 9277           | 66.2±15.8        | 9256           | 1    |
|                      |                |      |                   |                    | Q3 | 93                                      | Wang et al (85)     | 75±13.4          | 9245           | 66.2±15.8        | 9256           | 1    |
| 12                   | Wang et al**   | 2022 | United States     | Prospective Cohort | Q2 | 58                                      | Wang et al (86)     | 58.1±9.4         | 13548          | 54.4±10.9        | 13395          | 1    |
|                      |                |      |                   |                    | Q3 | 93                                      | Wang et al (87)     | 61.1±9.9         | 13480          | 54.4±10.9        | 13395          | 1    |
| 13                   | Chang et al    | 2023 | United Kingdom    | Prospective Cohort | Q2 | 16.7                                    | Chang et al (88)    | 66.4±24.3        | 49356          | 57.6±23.6        | 49357          | 1    |
|                      |                |      |                   |                    | Q3 | 24.3                                    | Chang et al (89)    | 71.3±26.4        | 49357          | 57.6±23.6        | 49357          | 1    |
|                      |                |      |                   |                    | Q4 | 41.4                                    | Chang et al (90)    | 75±30.2          | 49356          | 57.6±23.6        | 49357          | 1    |
| AVERAGE              |                |      |                   |                    |    |                                         |                     | 74.20±23.87      | 21276          | 62.61±20.17      | 21284          |      |
| SATURATED FAT INTAKE |                |      |                   |                    |    |                                         |                     |                  |                |                  |                |      |
| NO REF               | STUDY          | YEAR | COUNTRY OF ORIGIN | TYPE OF STUDY      | Q  | UPF PROPORTION IN WEIGHT PROPORTION (%) | STUDY CODE          | Hi-Mean±SD (g/d) | Hi-Sample Size | Lo-Mean±SD (g/d) | Lo-Sample Size | Auto |
| 3                    | Beslay et al   | 2020 | French            | Prospective Cohort | Q2 | 13.2                                    | Beslay et al (91)   | 32.7±12.7        | 27576          | 29.7±12.2        | 27609          | 1    |
|                      |                |      |                   |                    | Q3 | 18.7                                    | Beslay et al (92)   | 33.9±13.2        | 27556          | 29.7±12.2        | 27609          | 1    |
|                      |                |      |                   |                    | Q4 | 32.4                                    | Beslay et al (93)   | 34.74±13.9       | 27519          | 29.7±12.2        | 27609          | 1    |
| 8                    | Zhong et al    | 2021 | America           | Prospective Cohort | Q2 | 8                                       | Zhong et al (94)    | 17±8.4           | 18378          | 14±8.1           | 18378          | 1    |
|                      |                |      |                   |                    | Q3 | 16                                      | Zhong et al (95)    | 20.4±10.2        | 18379          | 14±8.1           | 18378          | 1    |
|                      |                |      |                   |                    | Q4 | 30                                      | Zhong et al (96)    | 22.7±12.3        | 18377          | 14±8.1           | 18378          | 1    |
|                      |                |      |                   |                    | Q2 | 82                                      | Zhong et al (97)    | 25.9±14.4        | 18379          | 14±8.1           | 18378          | 1    |
| 9                    | Bonaccio et al | 2022 | Italy             | Prospective Cohort | Q2 | 5.8                                     | Bonaccio et al (98) | 23±7             | 293            | 21±6             | 292            | 1    |
|                      |                |      |                   |                    | Q3 | 8.6                                     | Bonaccio et al (99) | 25±8             | 293            | 21±6             | 292            | 1    |

|                    |                 |      |                   |                    | Q4 | 15                                      | Bonaccio et al (100)  | 26±10            | 293            | 21±6             | 292            | 1    |
|--------------------|-----------------|------|-------------------|--------------------|----|-----------------------------------------|-----------------------|------------------|----------------|------------------|----------------|------|
| AVERAGE            |                 |      |                   |                    |    |                                         |                       | 58.69±11.01      | 15704          | 20.81±8.70       | 15722          |      |
| FIBER INTAKE       |                 |      |                   |                    |    |                                         |                       |                  |                |                  |                |      |
| NO REF             | STUDY           | YEAR | COUNTRY OF ORIGIN | TYPE OF STUDY      | Q  | UPF PROPORTION IN WEIGHT PROPORTION (%) | STUDY CODE            | Hi-Mean±SD (g/d) | Hi-Sample Size | Lo-Mean±SD (g/d) | Lo-Sample Size | Auto |
| 2                  | Srou et al      | 2019 | French            | Prospective Cohort | Q2 | 13                                      | Srou et al (101)      | 20.1±6.9         | 26418          | 21±7.7           | 26396          | 1    |
|                    |                 |      |                   |                    | Q3 | 18.3                                    | Srou et al (102)      | 19.3±6.8         | 26326          | 21±7.7           | 26396          | 1    |
|                    |                 |      |                   |                    | Q4 | 30.8                                    | Srou et al (103)      | 17.4±6.9         | 26019          | 21±7.7           | 26396          | 1    |
| 3                  | Beslay et al    | 2020 | French            | Prospective Cohort | Q2 | 13.2                                    | Beslay et al (104)    | 20±7.4           | 27576          | 21±8.1           | 27609          | 1    |
|                    |                 |      |                   |                    | Q3 | 18.7                                    | Beslay et al (105)    | 19.7±7.3         | 27556          | 21±8.1           | 27609          | 1    |
|                    |                 |      |                   |                    | Q4 | 32.4                                    | Beslay et al (106)    | 17.7±7.4         | 27519          | 21±8.1           | 27609          | 1    |
| 7                  | Romaguera et al | 2021 | Spain             | Case Control       | Q2 | 14.55                                   | Romaguera et al (107) | 12±3.68          | 1169           | 13.6±4.18        | 1170           | 1    |
|                    |                 |      |                   |                    | Q3 | 76.91                                   | Romaguera et al (108) | 10.8±3.66        | 1204           | 13.6±4.18        | 1170           | 1    |
| 8                  | Zhong et al     | 2021 | America           | Prospective Cohort | Q2 | 8                                       | Zhong et al (109)     | 16.6±7.6         | 18378          | 17.8±9.4         | 18378          | 1    |
|                    |                 |      |                   |                    | Q3 | 16                                      | Zhong et al (110)     | 17.7±7.8         | 18379          | 17.8±9.4         | 18378          | 1    |
|                    |                 |      |                   |                    | Q4 | 30                                      | Zhong et al (111)     | 18.6±8.2         | 18377          | 17.8±9.4         | 18378          | 1    |
|                    |                 |      |                   |                    | Q5 | 82                                      | Zhong et al (112)     | 19.3±8.9         | 18379          | 17.8±9.4         | 18378          | 1    |
| 9                  | Bonaccio et al  | 2022 | Italy             | Prospective Cohort | Q2 | 5.8                                     | Bonaccio et al (113)  | 20±7             | 293            | 21±7             | 292            | 1    |
|                    |                 |      |                   |                    | Q3 | 8.6                                     | Bonaccio et al (114)  | 20±7             | 293            | 21±7             | 292            | 1    |
|                    |                 |      |                   |                    | Q4 | 15                                      | Bonaccio et al (115)  | 19±7             | 293            | 21±7             | 292            | 1    |
| 11                 | Wang et al*     | 2022 | United States     | Prospective Cohort | Q2 | 58                                      | Wang et al (116)      | 20.7±6.3         | 9277           | 23.4±8.3         | 9256           | 1    |
|                    |                 |      |                   |                    | Q3 | 93                                      | Wang et al (117)      | 19.4±6.6         | 9245           | 23.4±8.3         | 9256           | 1    |
| 12                 | Wang et al**    | 2022 | United States     | Prospective Cohort | Q2 | 58                                      | Wang et al (118)      | 17.6±5           | 13548          | 19.5±6.2         | 13395          | 1    |
|                    |                 |      |                   |                    | Q3 | 93                                      | Wang et al (119)      | 15.9±4.9         | 13480          | 19.5±6.2         | 13395          | 1    |
| 13                 | Chang et al     | 2023 | United Kingdom    | Prospective Cohort | Q2 | 16.7                                    | Chang et al (120)     | 25±10            | 49356          | 23.2±9.9         | 49357          | 1    |
|                    |                 |      |                   |                    | Q3 | 24.3                                    | Chang et al (121)     | 26.1±10.7        | 49357          | 23.2±9.9         | 49357          | 1    |
|                    |                 |      |                   |                    | Q4 | 41.4                                    | Chang et al (122)     | 26.1±11.8        | 49356          | 23.2±9.9         | 49357          | 1    |
| AVERAGE            |                 |      |                   |                    |    |                                         |                       | 19.05±7.22       | 19627          | 20.13±7.87       | 19642          |      |
| ADDED SUGAR INTAKE |                 |      |                   |                    |    |                                         |                       |                  |                |                  |                |      |
| NO REF             | STUDY           | YEAR | COUNTRY OF ORIGIN | TYPE OF STUDY      | Q  | UPF PROPORTION IN WEIGHT PROPORTION (%) | STUDY CODE            | Hi-Mean±SD (g/d) | Hi-Sample Size | Lo-Mean±SD (g/d) | Lo-Sample Size | Auto |
| 3                  | Beslay et al    | 2020 | French            | Prospective Cohort | Q2 | 13.2                                    | Beslay et al (123)    | 90.9±32.7        | 27576          | 85.3±33.9        | 27609          | 1    |
|                    |                 |      |                   |                    | Q3 | 18.7                                    | Beslay et al (124)    | 93.7±34          | 27556          | 85.3±33.9        | 27609          | 1    |
|                    |                 |      |                   |                    | Q4 | 32.4                                    | Beslay et al (125)    | 99.1±39.1        | 27519          | 85.3±33.9        | 27609          | 1    |

|                                                                                                                                                                                                                                     |                |      |                   |                    |    |                                         |                      |                   |                |                   |                |      |
|-------------------------------------------------------------------------------------------------------------------------------------------------------------------------------------------------------------------------------------|----------------|------|-------------------|--------------------|----|-----------------------------------------|----------------------|-------------------|----------------|-------------------|----------------|------|
| 8                                                                                                                                                                                                                                   | Zhong et al    | 2021 | America           | Prospective Cohort | Q2 | 8                                       | Zhong et al (126)    | 38.64±18.3        | 18378          | 29.28±16.67       | 18378          | 1    |
|                                                                                                                                                                                                                                     |                |      |                   |                    | Q3 | 16                                      | Zhong et al (127)    | 49.14±23.33       | 18379          | 29.28±16.67       | 18378          | 1    |
|                                                                                                                                                                                                                                     |                |      |                   |                    | Q4 | 30                                      | Zhong et al (128)    | 59.64±30.42       | 18377          | 29.28±16.67       | 18378          | 1    |
|                                                                                                                                                                                                                                     |                |      |                   |                    | Q5 | 82                                      | Zhong et al (129)    | 83.58±58.75       | 18379          | 29.28±16.67       | 18378          | 1    |
| 9                                                                                                                                                                                                                                   | Bonaccio et al | 2022 | Italy             | Prospective Cohort | Q2 | 5.8                                     | Bonaccio et al (130) | 76±28             | 293            | 77±28             | 292            | 1    |
|                                                                                                                                                                                                                                     |                |      |                   |                    | Q3 | 8.6                                     | Bonaccio et al (131) | 82±33             | 293            | 77±28             | 292            | 1    |
|                                                                                                                                                                                                                                     |                |      |                   |                    | Q4 | 15                                      | Bonaccio et al (132) | 94±33             | 293            | 77±28             | 292            | 1    |
| 11                                                                                                                                                                                                                                  | Wang et al*    | 2022 | United States     | Prospective Cohort | Q2 | 58                                      | Wang et al (133)     | 49.4±30.7         | 9277           | 33±22.3           | 9256           | 1    |
|                                                                                                                                                                                                                                     |                |      |                   |                    | Q3 | 93                                      | Wang et al (134)     | 56.6±39           | 9245           | 33±22.3           | 9256           | 1    |
| 12                                                                                                                                                                                                                                  | Wang et al**   | 2022 | United States     | Prospective Cohort | Q2 | 58                                      | Wang et al (135)     | 42.4±25.8         | 13548          | 32.1±21.4         | 13395          | 1    |
|                                                                                                                                                                                                                                     |                |      |                   |                    | Q2 | 93                                      | Wang et al (136)     | 47±31.1           | 13480          | 32.1±21.4         | 13395          | 1    |
| AVERAGE                                                                                                                                                                                                                             |                |      |                   |                    |    |                                         |                      | 68.72±32.66       | 14471          | 52.44±24.27       | 14466          |      |
| CHOLESTEROL INTAKE                                                                                                                                                                                                                  |                |      |                   |                    |    |                                         |                      |                   |                |                   |                |      |
| NO REF                                                                                                                                                                                                                              | STUDY          | YEAR | COUNTRY OF ORIGIN | TYPE OF STUDY      | Q  | UPF PROPORTION IN WEIGHT PROPORTION (%) | STUDY CODE           | Hi-Mean±SD (mg/d) | Hi-Sample Size | Lo-Mean±SD (mg/d) | Lo-Sample Size | Auto |
| 8                                                                                                                                                                                                                                   | Zhong et al    | 2021 | America           | Prospective Cohort | Q2 | 8                                       | Zhong et al (137)    | 181.3±105.1       | 18378          | 154.9±108.2       | 18378          | 1    |
|                                                                                                                                                                                                                                     |                |      |                   |                    | Q3 | 16                                      | Zhong et al (138)    | 211.8±122.3       | 18379          | 154.9±108.2       | 18378          | 1    |
|                                                                                                                                                                                                                                     |                |      |                   |                    | Q4 | 30                                      | Zhong et al (139)    | 232.8±137.3       | 18377          | 154.9±108.2       | 18378          | 1    |
|                                                                                                                                                                                                                                     |                |      |                   |                    | Q5 | 82                                      | Zhong et al (140)    | 263.8±162         | 18379          | 154.9±108.2       | 18378          | 1    |
| 9                                                                                                                                                                                                                                   | Bonaccio et al | 2022 | Italy             | Prospective Cohort | Q2 | 5.8                                     | Bonaccio et al (141) | 280±87            | 293            | 257±79            | 292            | 1    |
|                                                                                                                                                                                                                                     |                |      |                   |                    | Q3 | 8.6                                     | Bonaccio et al (142) | 287±97            | 293            | 257±79            | 292            | 1    |
|                                                                                                                                                                                                                                     |                |      |                   |                    | Q4 | 15                                      | Bonaccio et al (143) | 303±114           | 293            | 257±79            | 292            | 1    |
| AVERAGE                                                                                                                                                                                                                             |                |      |                   |                    |    |                                         |                      | 251.39±117.81     | 10627          | 198.66±96.69      | 10627          |      |
| NOTES: <sup>1</sup> , obesity; <sup>2</sup> , diabetes; *, men; **, women; Q, Quartiles; Hi-Mean±SD, mean and standard deviation for high consume in Q2, Q3, Q4, Q5; Lo-Mean±SD, mean and standard deviation for low consume in Q1. |                |      |                   |                    |    |                                         |                      |                   |                |                   |                |      |
